# Supplementary material
Source: PubMed Central journal article supplement (PMC2990198)
Supplement: NIHMS233257-supplement-2.pdf [file NIHMS233257-supplement-2.pdf]

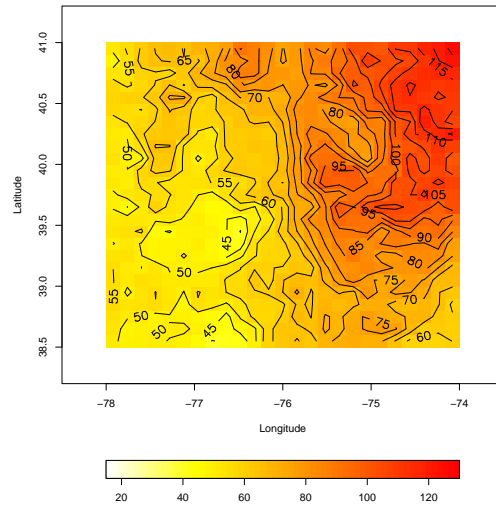

(a)

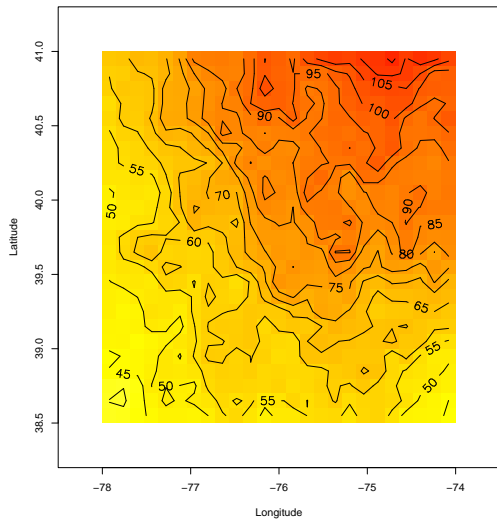

(b)

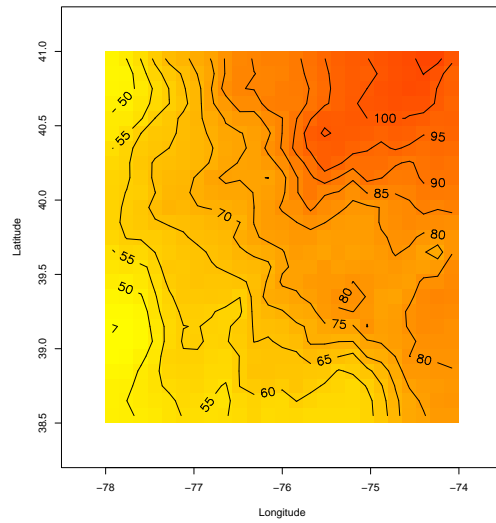

(c)

Figure 4 (Color version): (a) Simulated observed process at CMAQ grid cells, obtained by adding a white noise process, sampled from a  $N(0, 0.02)$  distribution, to the simulated true process. Predictive surface at CMAQ grid cells as obtained using: (b) Bayesian melding and (c) our downscaler. The legend for panels (a)-(c) is provided below panel (a).
