# Supplementary material
Source: PubMed Central journal article supplement (PMC2990198)
Supplement: NIHMS233257-supplement-3.pdf [file NIHMS233257-supplement-3.pdf]

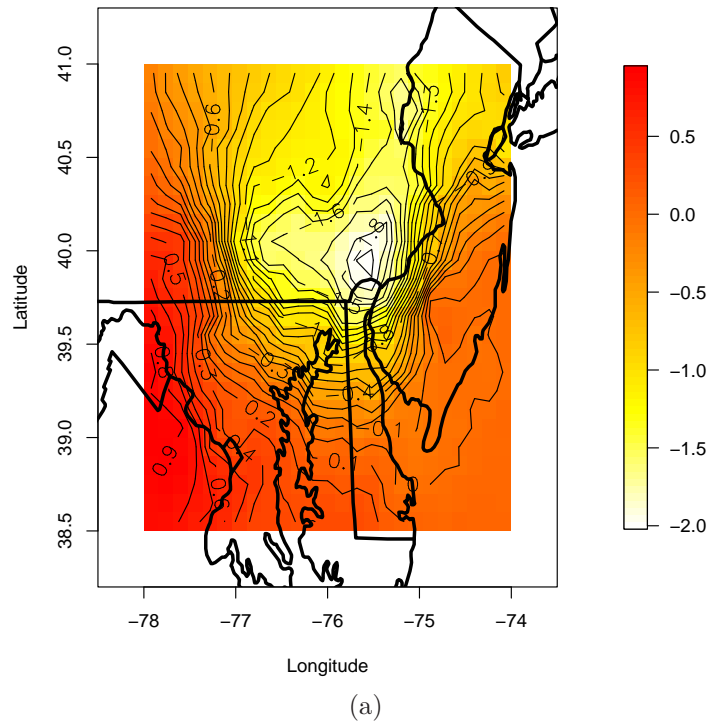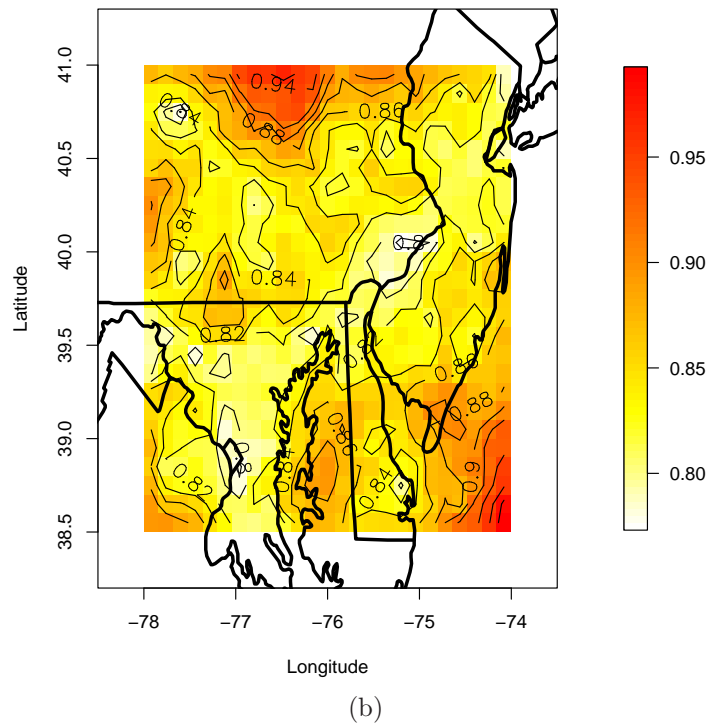

Figure 5 (Color version): (a) Posterior predictive mean and (b) standard deviation for the spatially-varying additive bias,  $\beta_0(\mathbf{s})$  of the CMAQ output for August 11, 2001.
