# Supplementary material
Source: PubMed Central journal article supplement (PMC2990198)
Supplement: NIHMS233257-supplement-4.pdf [file NIHMS233257-supplement-4.pdf]

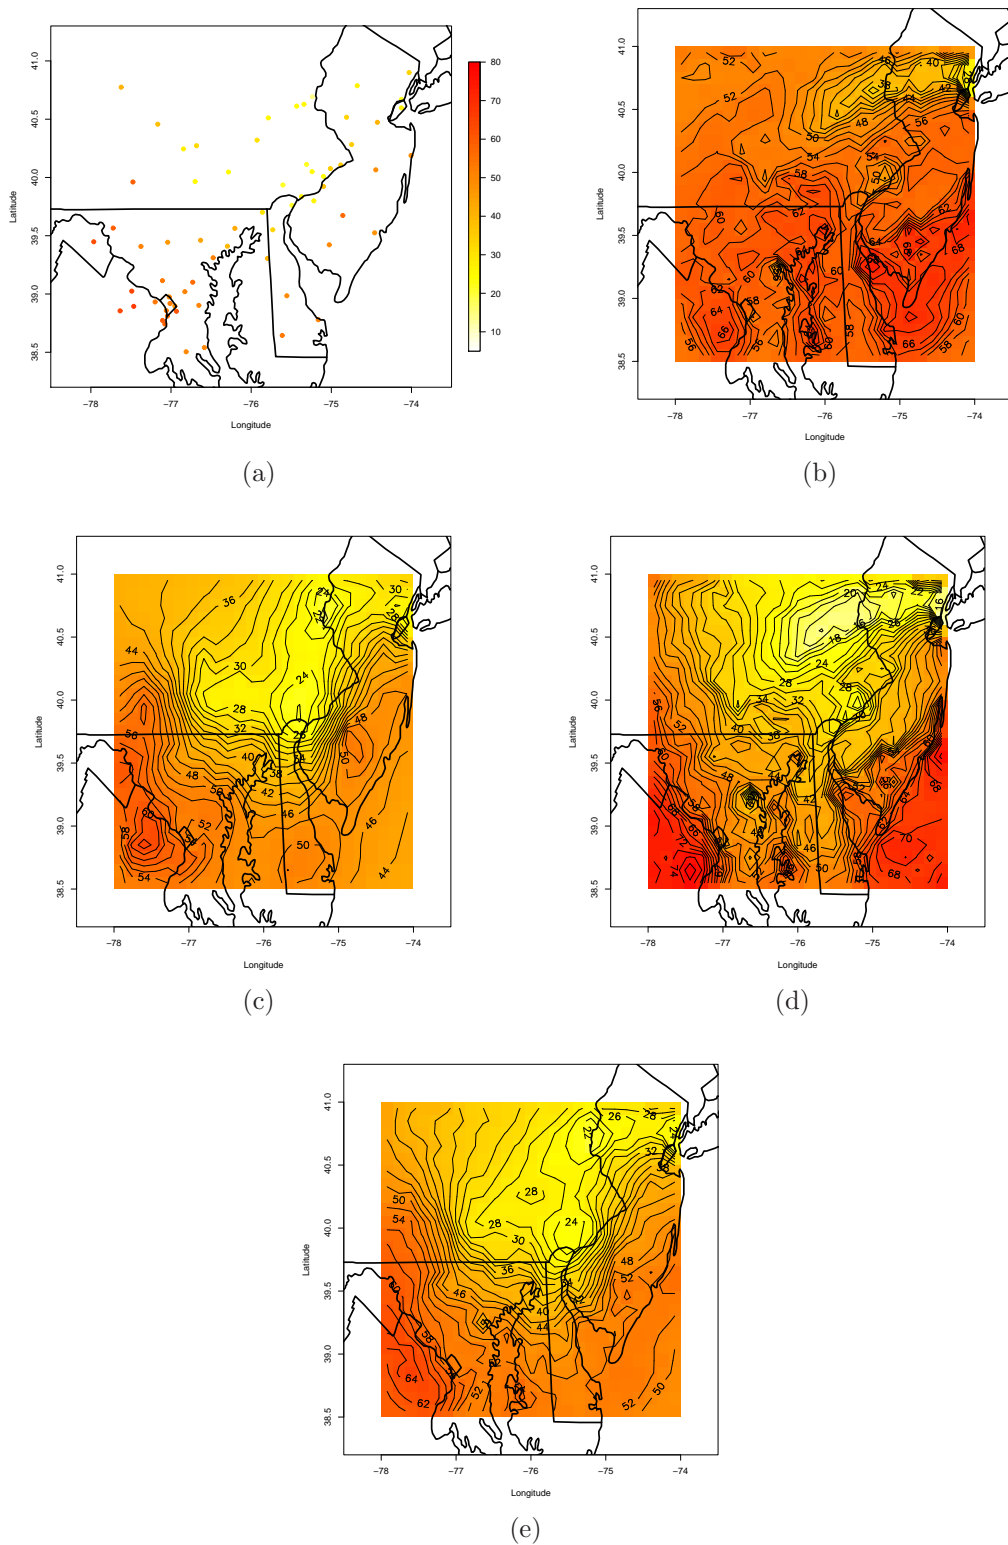

Figure 6 (Color version): (a) Observed ozone on August 11, 2001. Predicted ozone surface for August 11, 2001 as provided by: (b) CMAQ; (c) ordinary kriging; (d) Bayesian melding and (e) the downscaler method. The legend for panels (a)-(e) is provided beside panel (a).
