# Supplementary material
Source: PubMed Central journal article supplement (PMC2990198)
Supplement: NIHMS233257-supplement-5.pdf [file NIHMS233257-supplement-5.pdf]

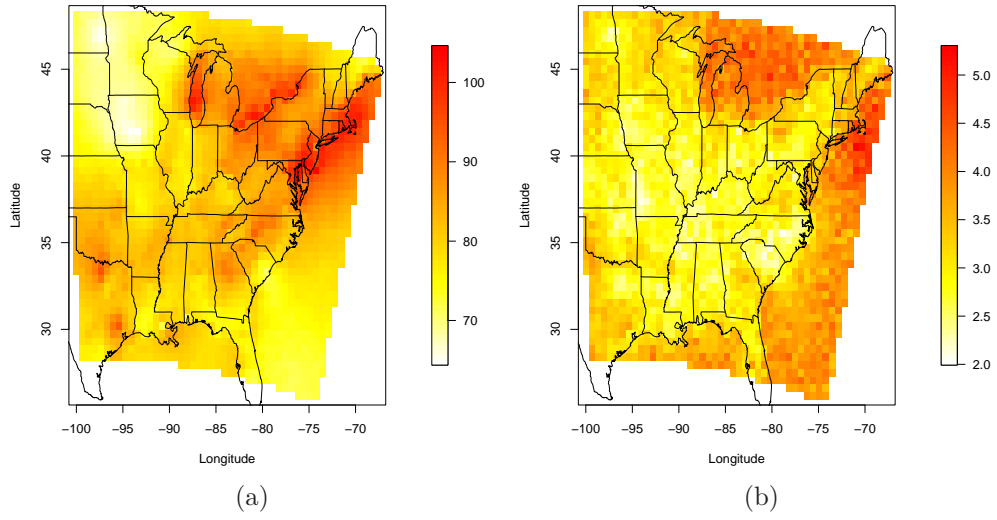

Figure 7 (Color version): (a) Posterior predictive mean and (b) posterior predictive standard deviation of the 4th highest ozone concentration during the period May 1–October 15 2001.
