# Supplementary material
Source: PubMed Central journal article supplement (PMC2990198)
Supplement: NIHMS233257-supplement-6.pdf [file NIHMS233257-supplement-6.pdf]

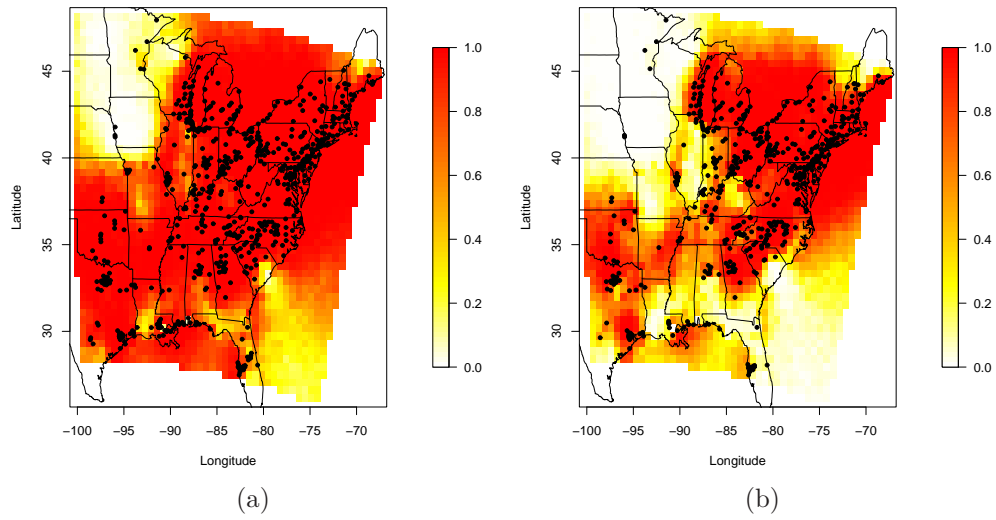

Figure 8 (Color version): Posterior predictive probability that the 4th highest ozone concentration during the period May 1–October 15 2001 is above (a) 75 ppb and (b) above 80 ppb. The dots show the observed occurrence that the 4th highest ozone concentration is above 75 ppb and 80 ppb, respectively.
