# Supplementary material
Source: PubMed Central journal article supplement (PMC2990198)
Supplement: NIHMS233257-supplement-7.pdf [file NIHMS233257-supplement-7.pdf]

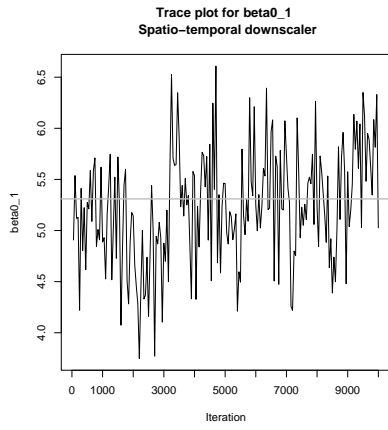

(a)

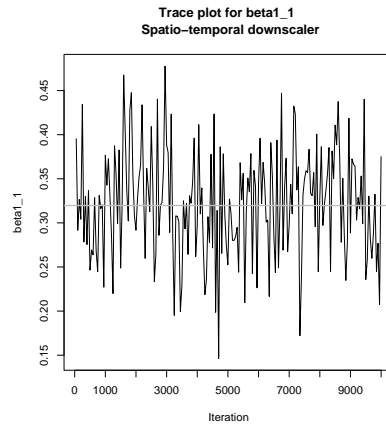

(b)

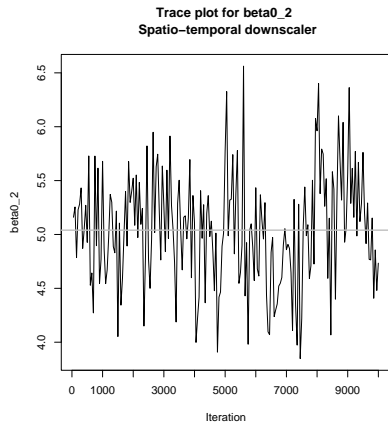

(c)

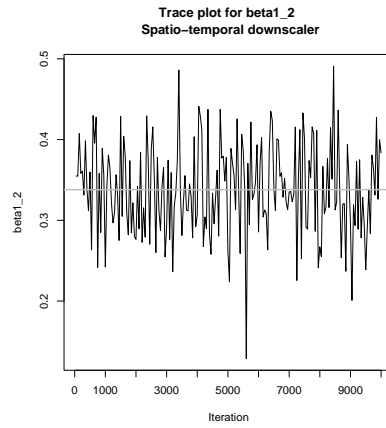

(d)

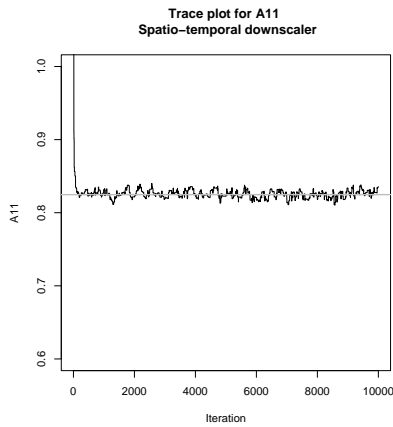

(e)

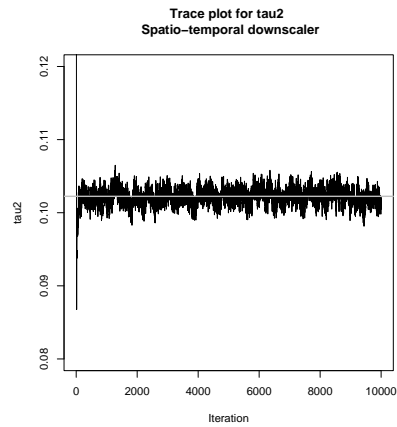

(f)

Trace plots of the parameters of the spatio-temporal version of the downscaler model with  $\beta_1(\mathbf{s}, t) = 0$  for all  $\mathbf{s}, t$ : (a)  $\beta_{01}$ ; (b)  $\beta_{11}$ ; (c)  $\beta_{02}$ ; (d)  $\beta_{12}$ ; (e)  $A_{11}$ ; (f)  $\tau^2$ . In each panels, the horizontal gray line indicates the posterior mean.
